# Supplementary material for: Clinicopathological and prognostic value of S100A4 expression in non-small cell lung cancer: a meta-analysis
Source: PubMed Central journal article supplement (PMC7396424; doi:10.1042/bsr20201710), 2020-07-30
Supplement: BSR-2020-1710_supp.pdf [file BSR-2020-1710_supp.pdf]

**Supplementary Table 1** Results of subgroup analysis of LNM by publication year, sample size, and ethnicity

| Subgroup analysis | No. of studies | No. of patients | <i>P</i> value | OR (95%CI)        | Heterogeneity             |                         |
|-------------------|----------------|-----------------|----------------|-------------------|---------------------------|-------------------------|
|                   |                |                 |                |                   | <i>I</i> <sup>2</sup> (%) | <i>P</i> <sub>Het</sub> |
| Total             | 20             | 1944            | <0.001         | 3.70 (2.25-6.06)  | 79.3                      | <0.001                  |
| Publication year  |                |                 |                |                   |                           |                         |
| <2009             | 9              | 817             | <0.001         | 4.66 (3.15-6.88)  | 29.1                      | 0.186                   |
| ≥2009             | 11             | 1127            | 0.007          | 3.11 (1.36-7.08)  | 85.9                      | <0.001                  |
| Sample size       |                |                 |                |                   |                           |                         |
| <90               | 9              | 636             | <0.001         | 2.61 (1.31-5.21)  | 85.5                      | <0.001                  |
| ≥90               | 11             | 1308            | 0.006          | 5.82 (3.35-10.10) | 42.1                      | 0.086                   |
| Ethnicity         |                |                 |                |                   |                           |                         |
| Chinese           | 16             | 1556            | <0.001         | 4.28 (2.31-7.91)  | 83.0                      | <0.001                  |
| Non-Chinese       | 4              | 388             | <0.001         | 2.42 (1.49-3.93)  | 0.0                       | 0.568                   |

**Abbreviations:** LNM, lymph node metastasis; OR, odds ratio.

**Supplementary Table 2** Results of subgroup analysis of TNM stage by publication year, sample size, and ethnicity

| Subgroup analysis | No. of studies | No. of patients | <i>P</i> value | OR (95%CI)        | Heterogeneity             |                         |
|-------------------|----------------|-----------------|----------------|-------------------|---------------------------|-------------------------|
|                   |                |                 |                |                   | <i>I</i> <sup>2</sup> (%) | <i>P</i> <sub>Het</sub> |
| Total             | 17             | 1695            | <0.001         | 3.08 (2.10-4.53)  | 56.6                      | 0.002                   |
| Publication year  |                |                 |                |                   |                           |                         |
| <2009             | 7              | 635             | 0.001          | 2.73 (1.47-5.08)  | 56.9                      | 0.030                   |
| ≥2009             | 10             | 1060            | <0.001         | 3.39 (2.01-5.70)  | 60.5                      | 0.007                   |
| Sample size       |                |                 |                |                   |                           |                         |
| <90               | 7              | 522             | 0.001          | 4.58 (1.93-10.83) | 63.0                      | 0.013                   |
| ≥90               | 10             | 1173            | <0.001         | 2.64 (1.75-3.99)  | 52.5                      | 0.026                   |
| Ethnicity         |                |                 |                |                   |                           |                         |
| Chinese           | 14             | 1442            | <0.001         | 3.63 (2.36-5.60)  | 59.4                      | 0.002                   |
| Non-Chinese       | 3              | 253             | 0.239          | 1.47 (0.77-2.78)  | 0.0                       | 0.878                   |

**Abbreviation:** OR, odds ratio.

**Supplementary Table 3** Results of subgroup analysis of Pathological subtype by publication year, sample size, and ethnicity

| Subgroup analysis | No. of studies | No. of patients | <i>P</i> value | OR (95%CI)        | Heterogeneity             |                         |
|-------------------|----------------|-----------------|----------------|-------------------|---------------------------|-------------------------|
|                   |                |                 |                |                   | <i>I</i> <sup>2</sup> (%) | <i>P</i> <sub>Het</sub> |
| Total             | 14             | 1272            | 0.020          | 1.77 (1.09-2.88)  | 67.2                      | <0.001                  |
| Publication year  |                |                 |                |                   |                           |                         |
| <2009             | 5              | 449             | 0.805          | 1.11 (0.49-2.51)  | 70.2                      | 0.009                   |
| ≥2009             | 9              | 823             | 0.003          | 2.30 (1.33-3.99)  | 57.8                      | 0.015                   |
| Sample size       |                |                 |                |                   |                           |                         |
| <90               | 7              | 507             | 0.011          | 2.54 (1.23-5.22)  | 57.7                      | 0.028                   |
| ≥90               | 7              | 765             | 0.383          | 1.34 (0.69-2.60)  | 73.8                      | 0.001                   |
| Ethnicity         |                |                 |                |                   |                           |                         |
| Chinese           | 12             | 1124            | 0.093          | 1.52 (0.93-2.49)  | 65.6                      | 0.001                   |
| Non-Chinese       | 2              | 148             | <0.001         | 4.92 (2.02-12.01) | 0.0                       | 0.421                   |

**Abbreviation:** OR, odds ratio.
